# Supplementary material for: Effect of Three Training Systems on Grapes in a Wet Region of China: Yield, Incidence of Disease and Anthocyanin Compositions of Vitis vinifera cv. Cabernet Sauvignon
Source: MDPI journal article supplement (doi:10.3390/molecules201018967), 2015-10-19
Supplement: s1 [file s1]

## Supplementary Material

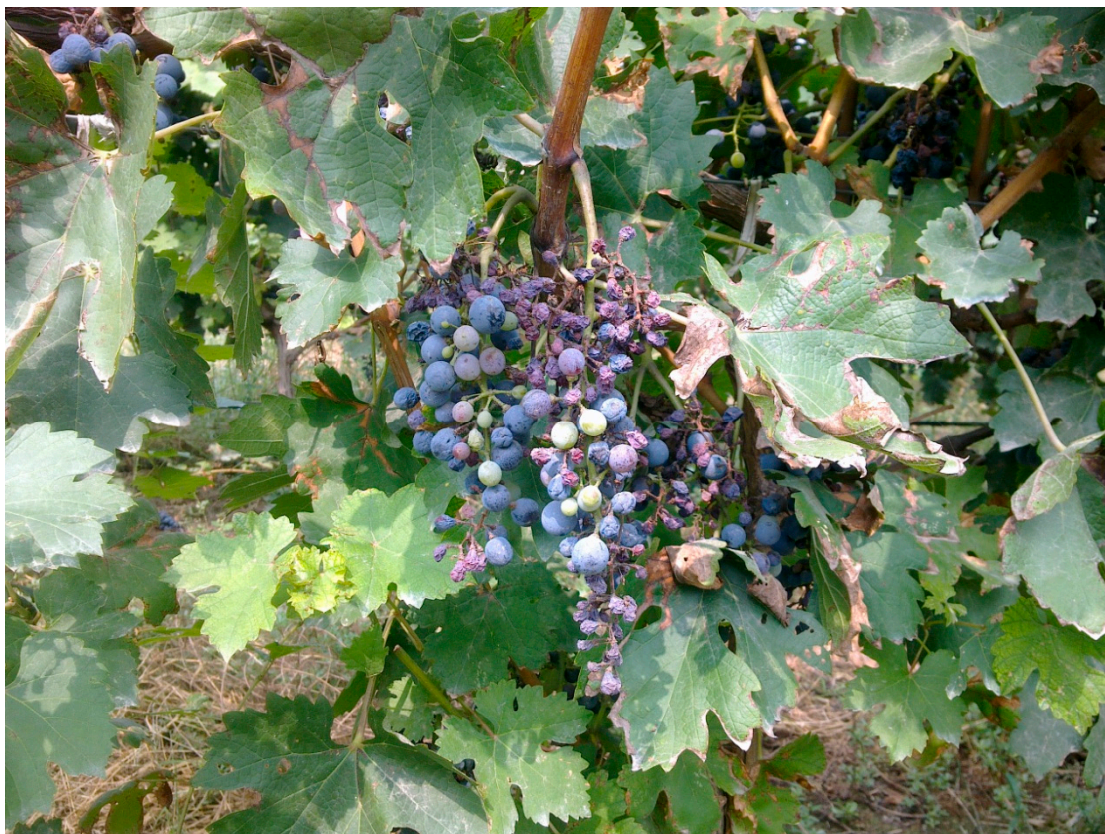

**Figure S1.** The picture of grape disease on leaves and berries.

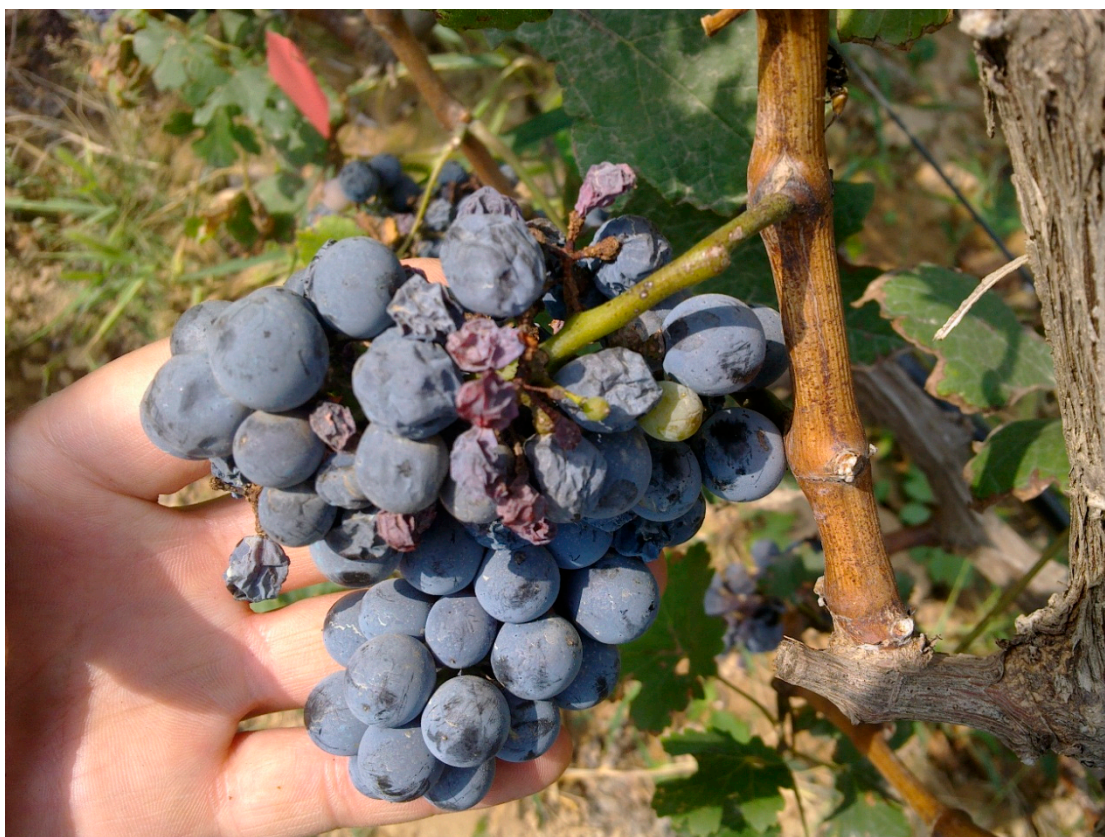

**Figure S2.** The picture of berry shrinkage caused by serious disease in 2013.



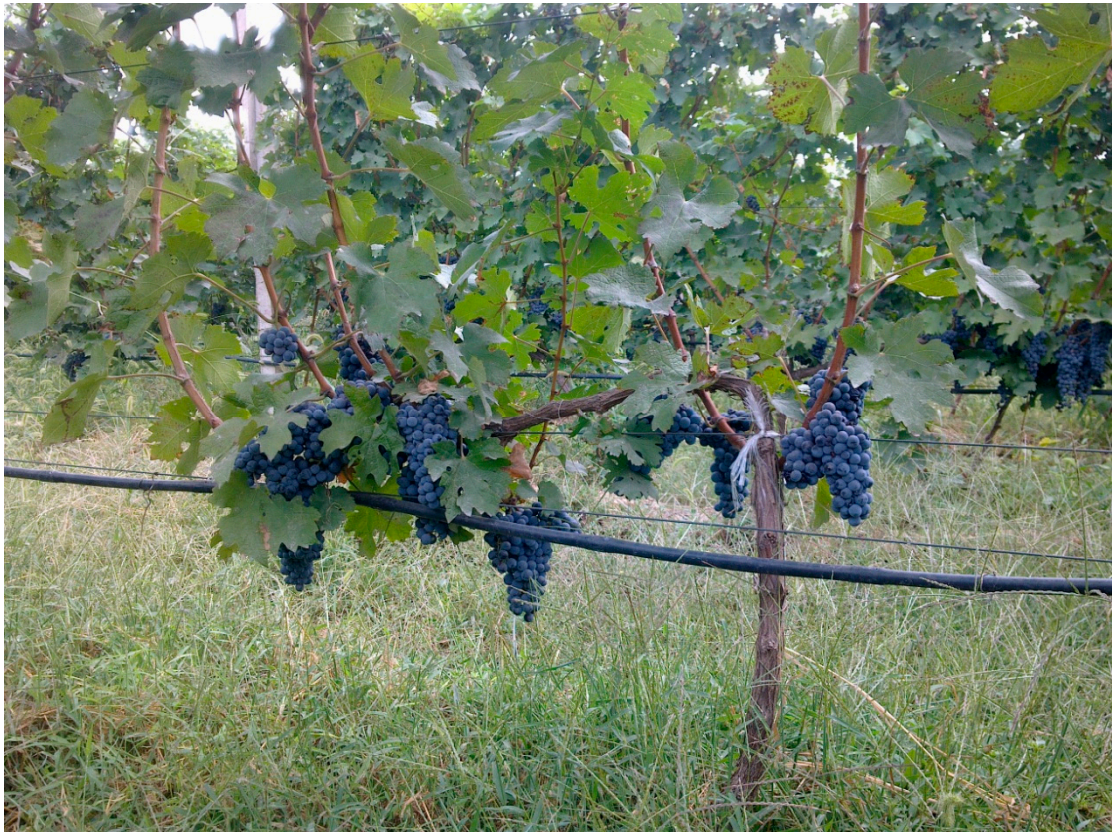

**Figure S3.** The picture of Single Guyot (SG) training system.

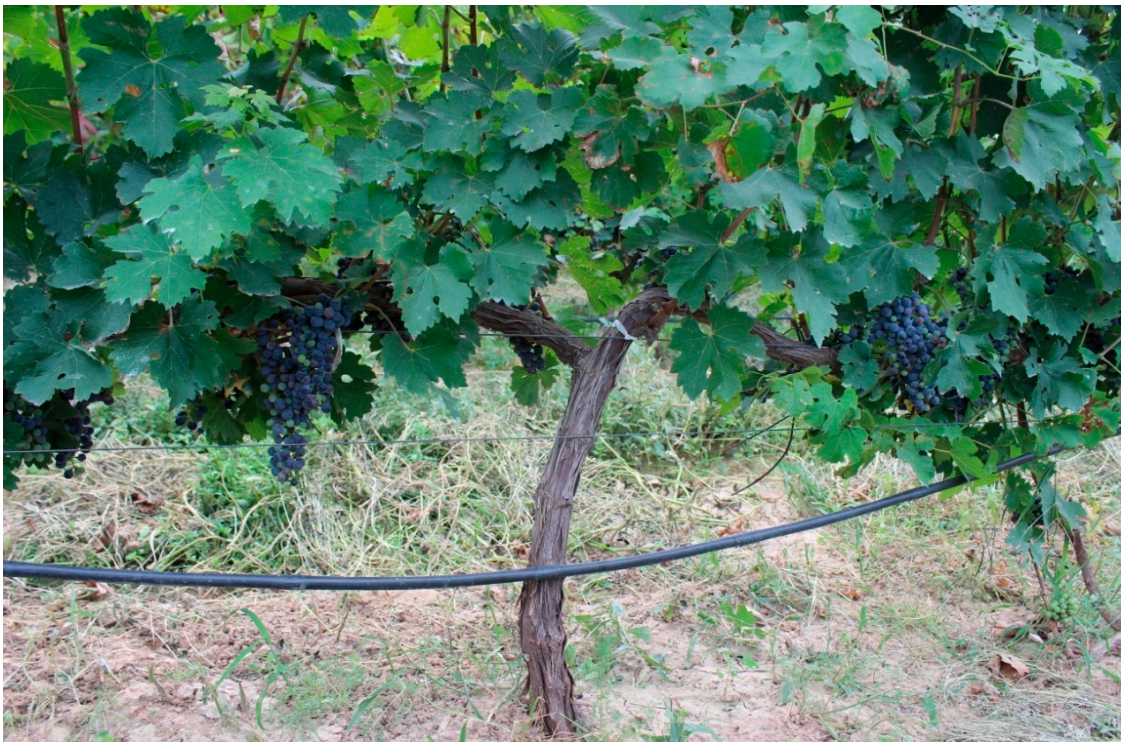

**Figure S4.** The picture of Spur-pruned Vertical Shoot-Positioned (VSP) training system.



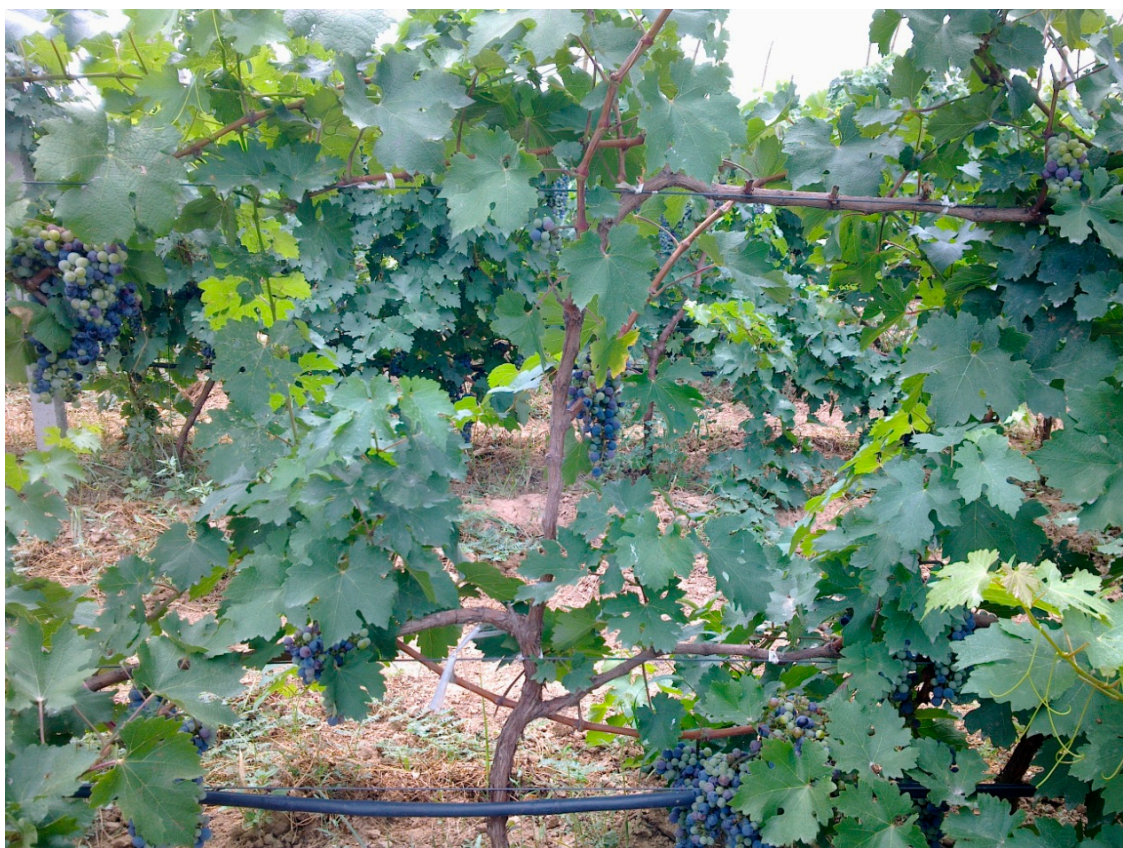

**Figure S5.** The picture of Four-Arm Kniffin (4AK) training system.

**Table S1.** Parameters of SG, VSP and 4AK vines, shoots and clusters.

| Parameter                    | Vintage   | SG           | VSP          | 4AK          |
|------------------------------|-----------|--------------|--------------|--------------|
| Canopy height (m)            | 2012/2013 | 1.3          | 1.3          | 1.5          |
| Canopy width (m)             | 2012/2013 | 0.7          | 0.7          | 0.7          |
| Distance between rows (m)    | 2012/2013 | 2.0          | 2.0          | 2.0          |
| Buds/vine (n)                | 2012      | 13.3 ± 1.4 b | 16.2 ± 1.9 b | 28.4 ± 2.6 a |
|                              | 2013      | 12.4 ± 2.4 c | 17.6 ± 2.9 b | 27.1 ± 4.1 a |
| Branches/vine (n)            | 2012      | 11.3 ± 0.9 b | 13.4 ± 1.3 b | 22.3 ± 2.7 a |
|                              | 2013      | 10.0 ± 0.7 c | 14.6 ± 2.3 b | 19.1 ± 2.8 a |
| Vegetative branches/vine (n) | 2012      | 2.1 ± 0.3 c  | 3.2 ± 0.3 b  | 4.1 ± 0.4 a  |
|                              | 2013      | 1.4 ± 0.2 b  | 2.3 ± 0.3 a  | 2.3 ± 0.5 a  |
| Bearing branches/vine (n)    | 2012      | 9.2 ± 1.1 b  | 10.2 ± 1.1 b | 18.2 ± 2.3 a |
|                              | 2013      | 9.5 ± 1.3 c  | 12.5 ± 0.9 b | 16.8 ± 2.1 a |
| Clusters/ bearing branch (n) | 2012      | 1.6 ± 0.2 a  | 1.5 ± 0.1 a  | 1.2 ± 0.1 b  |
|                              | 2013      | 1.8 ± 0.3 a  | 1.3 ± 0.1 b  | 1.2 ± 0.1 b  |
| Clusters/vines (n)           | 2012      | 17.9 ± 1.7 c | 20.3 ± 2.0 b | 25.7 ± 2.9 a |
|                              | 2013      | 18.3 ± 0.9 b | 18.9 ± 1.7 b | 23.3 ± 2.1 a |

Results presented are Means ± SD of five vines in each of three replicates. Different letters within a row indicate significant differences between treatments calculated by Duncan's test ( $p < 0.05$ ).
